# Supplementary material for: Prevalence of breast fibroadenoma in healthy physical examination population in Guangdong province of China: a cross-sectional study
Source: HighWire-hosted journal article supplement (doi:10.1136/bmjopen-2021-057080), 2022-06-01

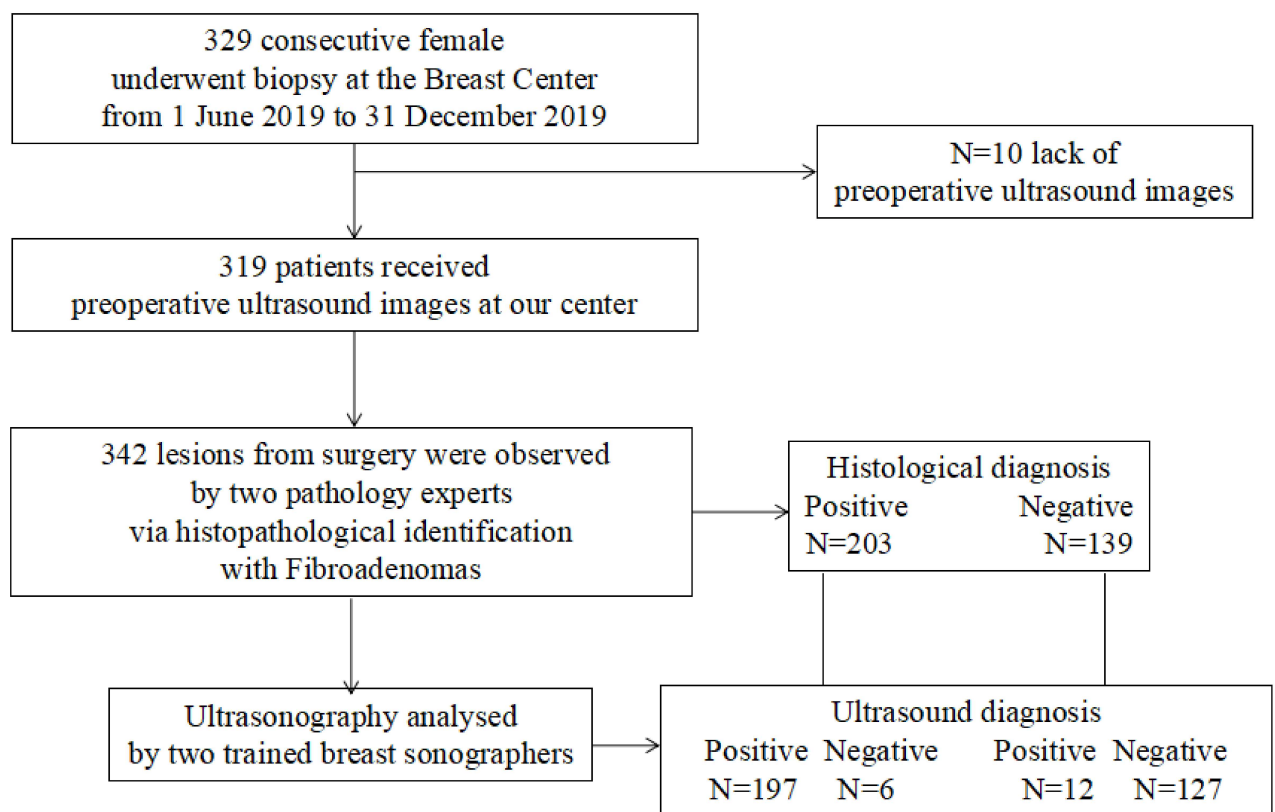

Supplement: bmjopen-2021-057080supp001_data_supplement.pdf [file bmjopen-2021-057080supp001_data_supplement.pdf]
